# Supplementary material
Source: PubMed Central journal article supplement (PMC4262642)
Supplement: NIHMS625921-supplement-Supp_FigureS1-S3___TableS1-S2.pdf [file NIHMS625921-supplement-Supp_FigureS1-S3___TableS1-S2.pdf]

## SUPPORTING INFORMATION

### Supporting Figure Legends

**Figure S1:** Cell morphology of suppressor mutants was analyzed by electron microscopy. *A. oris* cells of various strains (**A-P**) were immobilized on nickel-coated carbon grids and stained with 1% uranyl acetate prior to microscopic examination. Scale bars indicate 0.5  $\mu\text{m}$ .

**Figure S2:** Transposon insertion at ANA\_1289 caused a polar effect on downstream genes *acaC* and *lcp*. Expression levels of ANA\_1289 (**A**), *acaC* (ANA\_1291) (**B**), *lcp* (ANA\_1292) (**C**) and *srtC2* (**D**) in wild-type MG-1 and two suppressor mutants Tn5-2 and Tn5-12 were analyzed by real-time PCR (RT-PCR). The data were presented here as average of three independent experiments and expressed relative to the transcript abundance of MG1, which was arbitrarily assigned a value of 1. All measured transcripts were normalized by using the 16S rRNA gene as a housekeeping control. Asterisk (\*) indicates significance with  $P < 0.001$  by Student's *t* test.

**Figure S3:** Expression of AcaC in representative strains in each suppressor group was analyzed by immunoblotting. Cells of various strains grown to mid-log phase were normalized by optical density. Culture supernatant (S), cell wall (W), membrane (M), and cytoplasmic (C) fractions were obtained by cell fractionation. Equivalent protein samples were separated on 4-12% Tris-Glycine gradient gels and detected by immunoblotting with antibodies against AcaC ( $\alpha$ -AcaC) and SrtC2 ( $\alpha$ -SrtC2). Molecular mass markers are shown in kDa.

**Supporting Table S1:** Bacterial strains and plasmids used

| Strain & Plasmid                          | Description                                                                                                     | Reference                      |
|-------------------------------------------|-----------------------------------------------------------------------------------------------------------------|--------------------------------|
| <i>Strain</i>                             |                                                                                                                 |                                |
| <i>A. oris</i> MG-1                       | Parental strain                                                                                                 | (Mishra <i>et al.</i> , 2007)  |
| <i>A. oris</i> CW1                        | $\Delta galK$ ; an isogenic derivative of MG-1                                                                  | (Mishra <i>et al.</i> , 2010)  |
| <i>A. oris</i> AR4                        | $\Delta fimA$ ; an isogenic derivative of CW1                                                                   | (Mishra <i>et al.</i> , 2010)  |
| <i>A. oris</i> WU36                       | Conditional <i>srtA</i> deletion mutant ( $\Delta srtA$ ), containing pTetR- $\Omega$ -SrtA                     | This study                     |
| <i>A. oris</i> WU19                       | $\Delta srtA$ containing <i>PrpsJ</i> -SrtA                                                                     | This study                     |
| <i>A. oris</i> WU51                       | Deletion of 1291 ( $\Delta acaC$ ); an isogenic derivative of CW1                                               | This study                     |
| <i>A. oris</i> WU70                       | Deletion of 1289; an isogenic derivative of CW1                                                                 | This study                     |
| <i>A. oris</i> WU72                       | Deletion of 1292; an isogenic derivative of CW1                                                                 | This study                     |
| <i>A. oris</i> WU73                       | Deletion of <i>acaC</i> and <i>srtA</i> ; $\Delta acaC/\Delta srtA$                                             | This study                     |
| <i>A. oris</i> WU74                       | Deletion of 1292 and <i>srtA</i> ; $\Delta 1292/\Delta srtA$                                                    | This study                     |
| <i>A. oris</i> WU51c                      | WU51 containing pAcaC <sub>H6-TEV</sub>                                                                         | This study                     |
| <i>S. oralis</i> 34                       | RPS positive                                                                                                    | (Yoshida <i>et al.</i> , 2006) |
| <i>S. oralis</i> OC1                      | RPS negative                                                                                                    | (Yoshida <i>et al.</i> , 2006) |
| <i>Plasmid</i>                            |                                                                                                                 |                                |
| pJRD215                                   | <i>Actinomyces/E. coli</i> shuttle vector, Kan <sup>R</sup> , Str <sup>R</sup>                                  | (Yeung & Kozelsky, 1994)       |
| pRMC2                                     | a tetracycline-inducible expression vector                                                                      | (Corrigan & Foster, 2009)      |
| pJRD-Sm                                   | pJRD215 lacking the kanamycin-resistance cassette                                                               | This study                     |
| pTetR-SrtA                                | pJRD-Sm expressing SrtA under the control of the tetracycline-inducible system                                  | This study                     |
| pTetR-R*-SrtA                             | A derivative of pTetR-SrtA with a riboswitch element incorporated upstream of the start codon ATG               | This study                     |
| pTetR- $\Omega$ -SrtA                     | a derivative of pTetR-R*-SrtA with the <i>fimQ</i> promoter inserted upstream of the P <sub>xyIR</sub> promoter | This study                     |
| <i>PrpsJ</i> -SrtA                        | pJRD215 expressing SrtA under the control of the <i>rpsJ</i> promoter                                           | This study                     |
| <i>PrpsJ</i> -SrtA-C216A                  | <i>PrpsJ</i> -SrtA with C216A mutation in SrtA                                                                  | This study                     |
| <i>Pribo</i> -SrtA-C216A                  | a riboswitch element incorporated into <i>PrpsJ</i> -SrtA-C216A                                                 | This study                     |
| pAcaC                                     | pJRD215 expressing AcaC                                                                                         | This study                     |
| pAcaC <sub><math>\Delta</math>LPXTG</sub> | pJRD215 expressing AcaC lacking the LPXTG motif                                                                 | This study                     |
| pAcaC <sub><math>\Delta</math>CWS</sub>   | pJRD215 expressing AcaC lacking the cell wall sorting signal (CWS)                                              | This study                     |
| pAcaC <sub>H6-TEV</sub>                   | pJRD215 expressing AcaC with a TEV cleavage site, followed by a 6xHis-tag and the CWS                           | This study                     |

|                             |                                                                                         |                       |
|-----------------------------|-----------------------------------------------------------------------------------------|-----------------------|
| pCWU2                       | Derivative of pHTT177, expressing GalK under the control of the <i>rpsJ</i> promoter    | (Mishra et al., 2010) |
| pCWU3                       | Derivative of pHTT177, expressing mCherry under the control of the <i>rpsJ</i> promoter | (Wu & Ton-That, 2010) |
| pCWU2- $\Delta$ <i>srtA</i> | An allelic replacement vector of <i>srtA</i> using pCWU2                                | This study            |
| pCWU3- $\Delta$ <i>srtA</i> | An allelic replacement vector of <i>srtA</i> using pCWU3                                | This study            |
| pCWU2- $\Delta$ 1289        | An allelic replacement vector of 1289 using pCWU2                                       | This study            |
| pCWU2- $\Delta$ 1292        | An allelic replacement vector of 1292 using pCWU2                                       | This study            |
| pCWU2- $\Delta$ <i>acaC</i> | An allelic replacement vector of <i>acaC</i> using pCWU2                                | This study            |

---

**Supplementary Table S2:** Bacterial strains and plasmids used

| Primer            | Sequence <sup>(a)</sup>                                                 | Used for                 |
|-------------------|-------------------------------------------------------------------------|--------------------------|
| srtA-up-F         | GGCGGAATTCATCGTCTCGGCGATCTACGC                                          | pCWU2- $\Delta$ srtA     |
| srtA-up-R         | GGCGGGTACCTCGCACAAAGACCTCCTCTAGTCA                                      | pCWU2- $\Delta$ srtA     |
| srtA-dn-F         | GGCGGGTACCGGGGGTCAACTGATGTACGGCTT<br>CA                                 | pCWU2- $\Delta$ srtA     |
| srtA-dn-R         | GGCGTCTAGATAGGACTGGCGCAGCCACTTCT                                        | pCWU2- $\Delta$ srtA     |
| prpsJ-F           | GGCGGGATCCCGCCCGAGCGCGGGGACCAGT                                         | <i>PrpsJ</i> -SrtA       |
| prpsJ-R           | GGCGCATATGGGCGCCTAACCTCTCTTGTACTTG                                      | <i>PrpsJ</i> -SrtA       |
| com-SrtA-F        | GGCGGATATGATGACTAGAGGAGGTCTTGTGCG<br>AC GCGGA                           | <i>PrpsJ</i> -SrtA       |
| com-SrtA-R        | GGCGGAATTCGCCGAGGCGCCGTCGGGGAAG                                         | <i>PrpsJ</i> -SrtA       |
| kpnI-tetR-R       | GGCGGGTACCTTTAAGACCCACTTTTACATTTAA<br>G                                 | pTetR-SrtA               |
| EcoRI-tetR-F      | GGCGGAATTCCTCAAGCTTATTTTAATTATACTCTA<br>TC                              | pTetR-SrtA               |
| EcoRI-srtA-F(rls) | GGCGGAATTCGAGGAGGGGCGATGACTAGAG                                         | pTetR-SrtA               |
| HindIII-srtA-R    | GGCGAAGCTTCCGGCAGGTGCCGCCAGATGAAG                                       | pTetR-SrtA               |
| Ribo-srtA-F       | ATGCCCTTGGCAGCACCCCTGCTAAGGAGGCAAC<br>AAGATGACTAGAGGAGGTCTTGTGCGA       | pTetR-R*-SrtA            |
| Ribo-tet-R        | CAAGACGATGCTGGTATCACCGGTACCTATAGTG<br>AGTCGTATAGAATTGGACATCATCAGGCTAG   | pTetR-R*-SrtA            |
| PfimQ-tetR-R      | GGCGGAATTCGCCGATGGATTCCGATCATGAG                                        | pTetR- $\Omega$ -SrtA    |
| PfimQ-tetR-F      | GGCGAGATCTGATTCCTGCGCCCAGGAAAGTG                                        | pTetR- $\Omega$ -SrtA    |
| pJRD215-str-F     | GTGCTTGCGGCAGCGTGAAGCTAGCTTGG                                           | pJRD-Sm                  |
| pJRD215-str-R     | CGAGTT CTTCTGAGCG GGA CTCTGG                                            | pJRD-Sm                  |
| srtA(C216A)-F     | GCTCACGGATCGACCGCCGGTG                                                  | <i>PrpsJ</i> -SrtA-C216A |
| srtA(C216A)-R     | GGTGGTCAGCGTGATGTACCGGTC                                                | <i>PrpsJ</i> -SrtA-C216A |
| Ribo-srtA-F       | ATGCCCTTGGCAGCACCCCTGCTAAGGAGGCAAC<br>AAGATGACTAGAGGAGGTCTTGTGCGA       | <i>PrpsJ</i> -SrtA-C216A |
| Ribo-srtA-R       | CAAGACGATGCTGGTATCACCGGTACCTATAGTG<br>AGTCGTATTTGTA CTTGTCTTGGCCGGTCCAC | <i>PrpsJ</i> -SrtA-C216A |
| AcaC-up-F         | GGCGGAATTCCTGGGACTGCCGGACGAGTCCT<br>A                                   | pCWU2- $\Delta$ acaC     |
| AcaC-up-R         | GGCGGGTACCTCCAAGACGCATGAGTGCTCCTA<br>G                                  | pCWU2- $\Delta$ acaC     |
| AcaC-dn-F         | GGCGGGTACCACCGACGCCACCCCGGCGGCCT<br>CCA                                 | pCWU2- $\Delta$ acaC     |
| AcaC-dn-R         | GGCGTCTAGATTCTCCTGGGTGATCTTGAAGCTG                                      | pCWU2- $\Delta$ acaC     |
| 1289upF           | GGCGGAATTCCTCACGGGCGTAGACGGTGATG<br>GAC                                 | pCWU2- $\Delta$ 1289     |
| 1289upR           | GGCGGGTACCGGTGGCGAGCCACTGGCCGTTG<br>AC                                  | pCWU2- $\Delta$ 1289     |
| 1289dnF           | GGCGGGTACCATCGTGCGCAATGTGGACGCCTT<br>CT                                 | pCWU2- $\Delta$ 1289     |
| 1289dnR           | GGCGTCTAGATCCAGCTCCATGCCCTTGCTGTTG<br>AT                                | pCWU2- $\Delta$ 1289     |

|                         |                                                      |                        |
|-------------------------|------------------------------------------------------|------------------------|
| 1292upF                 | AAAGGT <u>ACCGGT</u> CAACGCCTACTACAACCCGACC<br>A     | pCWU2- $\Delta$ 1292   |
| 1292upR                 | AAAGAATT <u>CCGCT</u> GTGCTCGTCGTGGGAGGTGG<br>A      | pCWU2- $\Delta$ 1292   |
| 1292dnF                 | AAAGAATT <u>TCTAGT</u> CACTCGCCGGAGAGACCCCGA         | pCWU2- $\Delta$ 1292   |
| 1292dnR                 | AAAT <u>TCTAGA</u> ACACGTCATGTGTCGTCCCCGGAG<br>C     | pCWU2- $\Delta$ 1292   |
| com-AcaC-F              | GGCG <u>CATATG</u> CAAGCACCGGGACGCGGGTACGG<br>AGC    | pAcaC                  |
| com-AcaC-R              | GGCG <u>GAAATTC</u> AGTGTTTCCAGTCAGACTGGAAGG<br>A    | pAcaC                  |
| AcaC $_{\Delta$ LPXTG-F | GCCAACGGCCTGCTCTTCGGCG                               | pAcaC $_{\Delta$ LPXTG |
| AcaC $_{\Delta$ LPXTG-R | GGGCTTGCCGGAGGTGGAGGCCGC                             | pAcaC $_{\Delta$ LPXTG |
| AcaC $_{\Delta$ CWS-F   | GGGCTTGCCGGAGGTGGAGGCCGCCG                           | pAcaC $_{\Delta$ CWS   |
| AcaC $_{\Delta$ CWS-R   | TGATGATCGCCTCCTTCCAGT                                | pAcaC $_{\Delta$ CWS   |
| AcaC $_{6H-TEV}$ -F     | CACCACCACCACCACCACGGCAAGCCCCTGGCC<br>CAGACCG         | pAcaC $_{6H-TEV}$      |
| AcaC $_{6H-TEV}$ -R     | CGATTGGAAGTAGAGGTTCTCGGAGGTGGAGGC<br>CGCCGGGGTGGCGTC | pAcaC $_{6H-TEV}$      |
| RT-16s-F                | GTCGCTAGTAATCGCAGATCAG                               | 16S rRNA, RT-PCR       |
| RT-16s-R                | GGTGTGCGGACTTTCATG                                   | 16S rRNA RT-PCR        |
| RT-srtC2-F              | CCAGTACAACCAGTCGAAGG                                 | <i>srtC2</i> , RT-PCR  |
| RT-srtC2-R              | GAGAGCGCGTCATTGTAGG                                  | <i>srtC2</i> , RT-PCR  |
| RT-1289F                | GAGATCCCGCACGTCAAC                                   | ANA_1289, RT-PCR       |
| RT-1289R                | CTTGAGAGCGATGCCAG                                    | ANA_1289, RT-PCR       |
| RT-1291F                | GACGGCACCTACAAGATCAC                                 | <i>acaC</i> , RT-PCR   |
| RT-1291R                | AGGAGTCGGTCTTGCTGA                                   | <i>acaC</i> , RT-PCR   |
| RT-1292F                | GCTCAGTTCGCCACTATCAT                                 | <i>lcp</i> , RT-PCR    |
| RT-1292R                | AGAGGTTTCAGTCCGGTGTAG                                | <i>lcp</i> , RT-PCR    |

(a) Underlined are the restriction sites in the primers.

## Supporting Experimental Procedures

### Plasmid construction

*PrpsJ-SrtA*, *PrpsJ-SrtA-C216A*, and *Pribo-SrtA-C216A* – The promoter region of the *rpsJ* gene and the *srtA* coding region were amplified from the MG-1 chromosome by PCR with the primer pairs *rpsL-F/R* and *com-srtA-F/R*, respectively (Table S2). PCR products were digested with appropriate restriction enzymes and ligated into the BamHI and EcoRI sites of *E. coli/Actinomyces* shuttle vector pJRD215 (Yeung & Kozelsky, 1994) to yield *PrpsJ-SrtA*.

To generate *PrpsJ-SrtA-C216A*, the BamHI and EcoRI fragment above was subcloned into pUC19. The generated plasmid was used as a template for site-directed mutagenesis by inverse PCR using primers *srtA(C216A)-F/R* as previously described (Wu *et al.*, 2012). The resulting mutagenized *srtA* fragment was cloned into pJRD215 between BamHI and EcoRI sites. The desired mutation was confirmed by DNA sequencing.

To construct *Pribo-SrtA-C216A*, the pUC19 vector harboring the *rpsJ-SrtA-C216A* fragment was used as a template for introduction of the riboswitch E\* sequence (Topp *et al.*, 2010) upstream of the *srtA* coding sequence by inverse PCR using the primer pair *Ribo-srtA-F* and *Ribo-PrpsJ-R*. The generated plasmid was confirmed by DNA sequencing before it was digested with BamHI and EcoRI to release the *srtA*-containing fragment, which was then cloned into pJRD215.

*pCWU2-ΔsrtA* and *pCWU3-ΔsrtA* – One-kb fragments upstream and downstream of *srtA* were amplified from the MG-1 chromosome by PCR with primer sets *srtAupF/srtAupR* and *srtAdnF/srtAdnR*, respectively (Table S2). Generated fragments were digested with EcoRI/KpnI and KpnI/XbaI, respectively, and ligated into the *Actinomyces* deletion vector pCWU2 (Mishra *et*

al., 2010) or pCWU3 (Wu & Ton-That, 2010) pre-cut with EcoRI and XbaI. The resulting plasmids were confirmed by colony PCR and restrictive enzyme digestion.

pAcaC, pAcaC<sub>ΔLPXTG</sub> and pAcaC<sub>ΔCWS</sub> – A fragment encompassing the promoter region of the *acaC* gene and its open reading frame was PCR-amplified with primers com-AcaC-F/R. The PCR product treated with NdeI and EcoRI was cloned into pJRD215 pre-treated with the same enzymes to create pAcaC. To generate pAcaC<sub>ΔLPXTG</sub> and pAcaC<sub>ΔCWS</sub>, the treated *acaC* fragment above was cloned into pCWU2. The generated plasmid was used as a template for inverse PCR amplification using primers AcaC<sub>ΔLPXTG</sub>-F/R and AcaC<sub>ΔCWS</sub>-F/R, respectively (Table S2). The resulting mutations were verified by DNA sequencing.

pAcaC<sub>H6-TEV</sub> – pAcaC was used as a template for inverse PCR amplification using primers Rev-AcaC(H6)-F (5'-CACCAACCACCACCACGGCAAGCCCCTGGCCCAGACCG-3') and Rev-AcaC(TEV)-R (5'-CGATTGGAAGTAGAGGTTCTCGGAGGTGGAGGCCGCCGGGGTGGCGTC-3'). This strategy allows insertion of a TEV-protease cleavage site (ENLYFQS), followed by a 6xHis-Tag upstream of the AcaC LPXTG motif. The obtained PCR product was circulated to generate pAcaC<sub>H6-TEV</sub>, which was further verified by DNA sequencing.

### **Generation of antibodies against AcaC**

For antibody production, an expression vector for a recombinant AcaC protein lacking its signal peptide and cell wall sorting signal was generated as the following. The primers AcaC<sub>Ecoli</sub>-F (5'-aaaggatccaagatcgccgatgaccagc-3') and AcaC<sub>Ecoli</sub>-R (5'-aaactgcagttacttgccggaggtggagg-3') were used for PCR amplification of the *acaC* coding sequence from the chromosomal MG-1 DNA. The generated amplicon was treated with BamHI and BglII and cloned into the expression vector pQE30 (QIAGEN). The recombinant plasmid was transformed into *E. coli* XL1-Blue. Purification of the recombinant AcaC protein was carried out by affinity chromatography and the purified protein was used for antibody production accordingly (Mishra *et al.*, 2007).

## Supporting References

- Corrigan, R. M. & T. J. Foster, (2009) An improved tetracycline-inducible expression vector for *Staphylococcus aureus*. *Plasmid* **61**: 126-129.
- Mishra, A., A. Das, J. O. Cisar & H. Ton-That, (2007) Sortase-Catalyzed Assembly of Distinct Heteromeric Fimbriae in *Actinomyces naeslundii*. *J Bacteriol* **189**: 3156-3165.
- Mishra, A., C. Wu, J. Yang, J. O. Cisar, A. Das & H. Ton-That, (2010) The *Actinomyces oris* type 2 fimbrial shaft FimA mediates co-aggregation with oral streptococci, adherence to red blood cells and biofilm development. *Mol Microbiol* **77** 841–854.
- Topp, S., C. M. Reynoso, J. C. Seeliger, I. S. Goldlust, S. K. Desai, D. Murat, A. Shen, A. W. Puri, A. Komeili, C. R. Bertozzi, J. R. Scott & J. P. Gallivan, (2010) Synthetic riboswitches that induce gene expression in diverse bacterial species. *Appl Environ Microbiol* **76**: 7881-7884.
- Wu, C., A. Mishra, M. E. Reardon, I. H. Huang, S. C. Counts, A. Das & H. Ton-That, (2012) Structural Determinants of *Actinomyces* sortase SrtC2 Required for Membrane Localization and Assembly of Type 2 Fimbriae for Interbacterial Coaggregation and Oral Biofilm Formation. *J Bacteriol* **194**: 2531-2539.
- Wu, C. & H. Ton-That, (2010) Allelic exchange in *Actinomyces oris* with mCherry fluorescence counterselection. *Appl Environ Microbiol* **76**: 5987-5989.
- Yeung, M. K. & C. S. Kozelsky, (1994) Transformation of *Actinomyces* spp. by a gram-negative broad-host-range plasmid. *J Bacteriol* **176**: 4173-4176.
- Yoshida, Y., S. Ganguly, C. A. Bush & J. O. Cisar, (2006) Molecular basis of L-rhamnose branch formation in streptococcal coaggregation receptor polysaccharides. *J Bacteriol* **188**: 4125-4130.



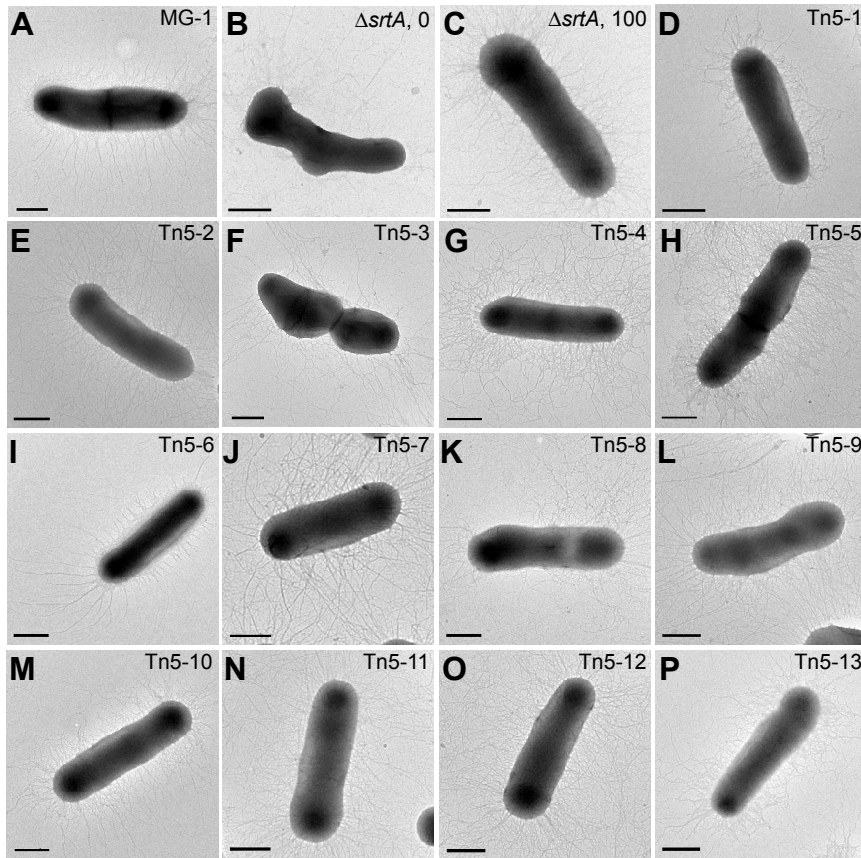

Figure S1: Wu et al.

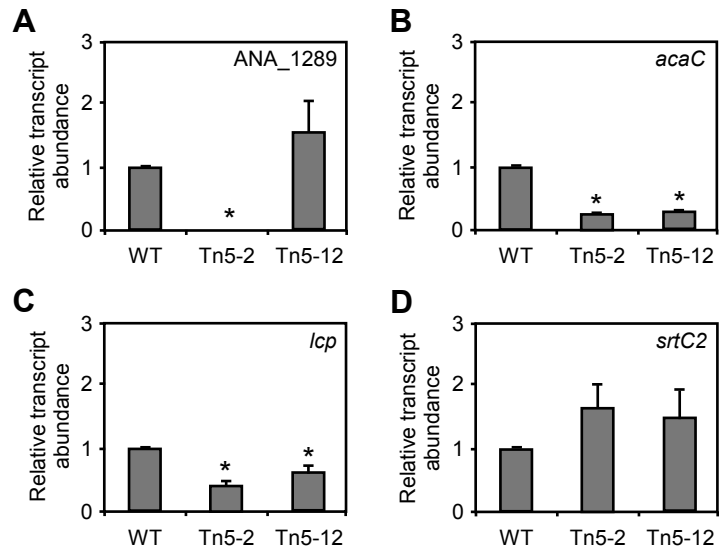

Figure S2: Wu et al.

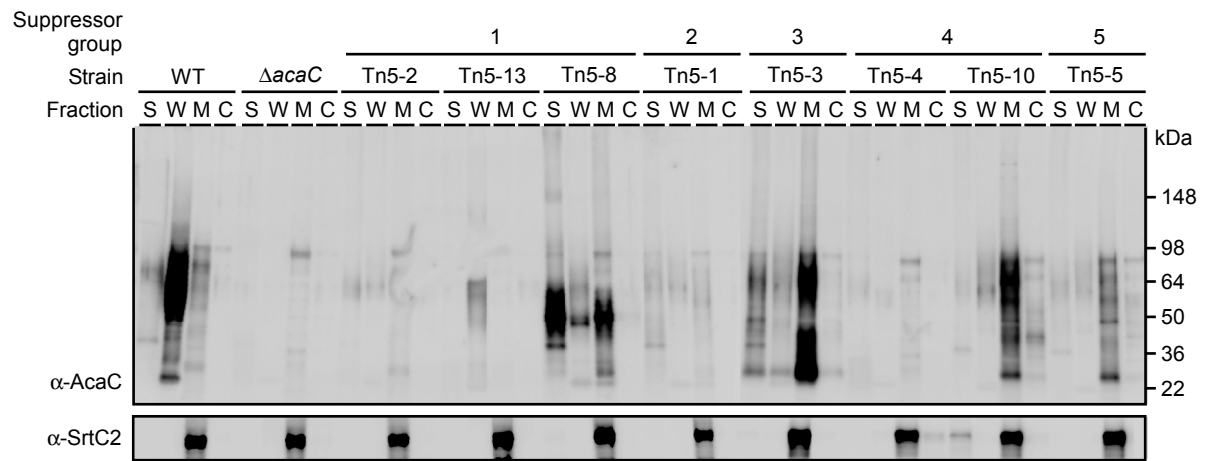

Figure S3: Wu et al.
